# Supplementary material for: TREM1 rs2234237 (Thr25Ser) Polymorphism in Patients with Cutaneous Leishmaniasis Caused by Leishmania guyanensis: A Case-Control Study in the State of Amazonas, Brazil
Source: MDPI journal article supplement (doi:10.3390/pathogens10040498), 2021-04-20
Supplement: s1 [file s1]

## Supporting information

**S1A Fig. *TREM1* rs2234237 A/T (Thr25Ser) influence on circulating cytokines plasma levels.**

**S1B Fig. *TREM1* rs2234237 A/T (Thr25Ser) influence on circulating cytokines plasma levels.**

**S1 Table. Circulating plasma cytokines levels in patients with CL and healthy controls adjusted by sex and age.**

## S1A Figure

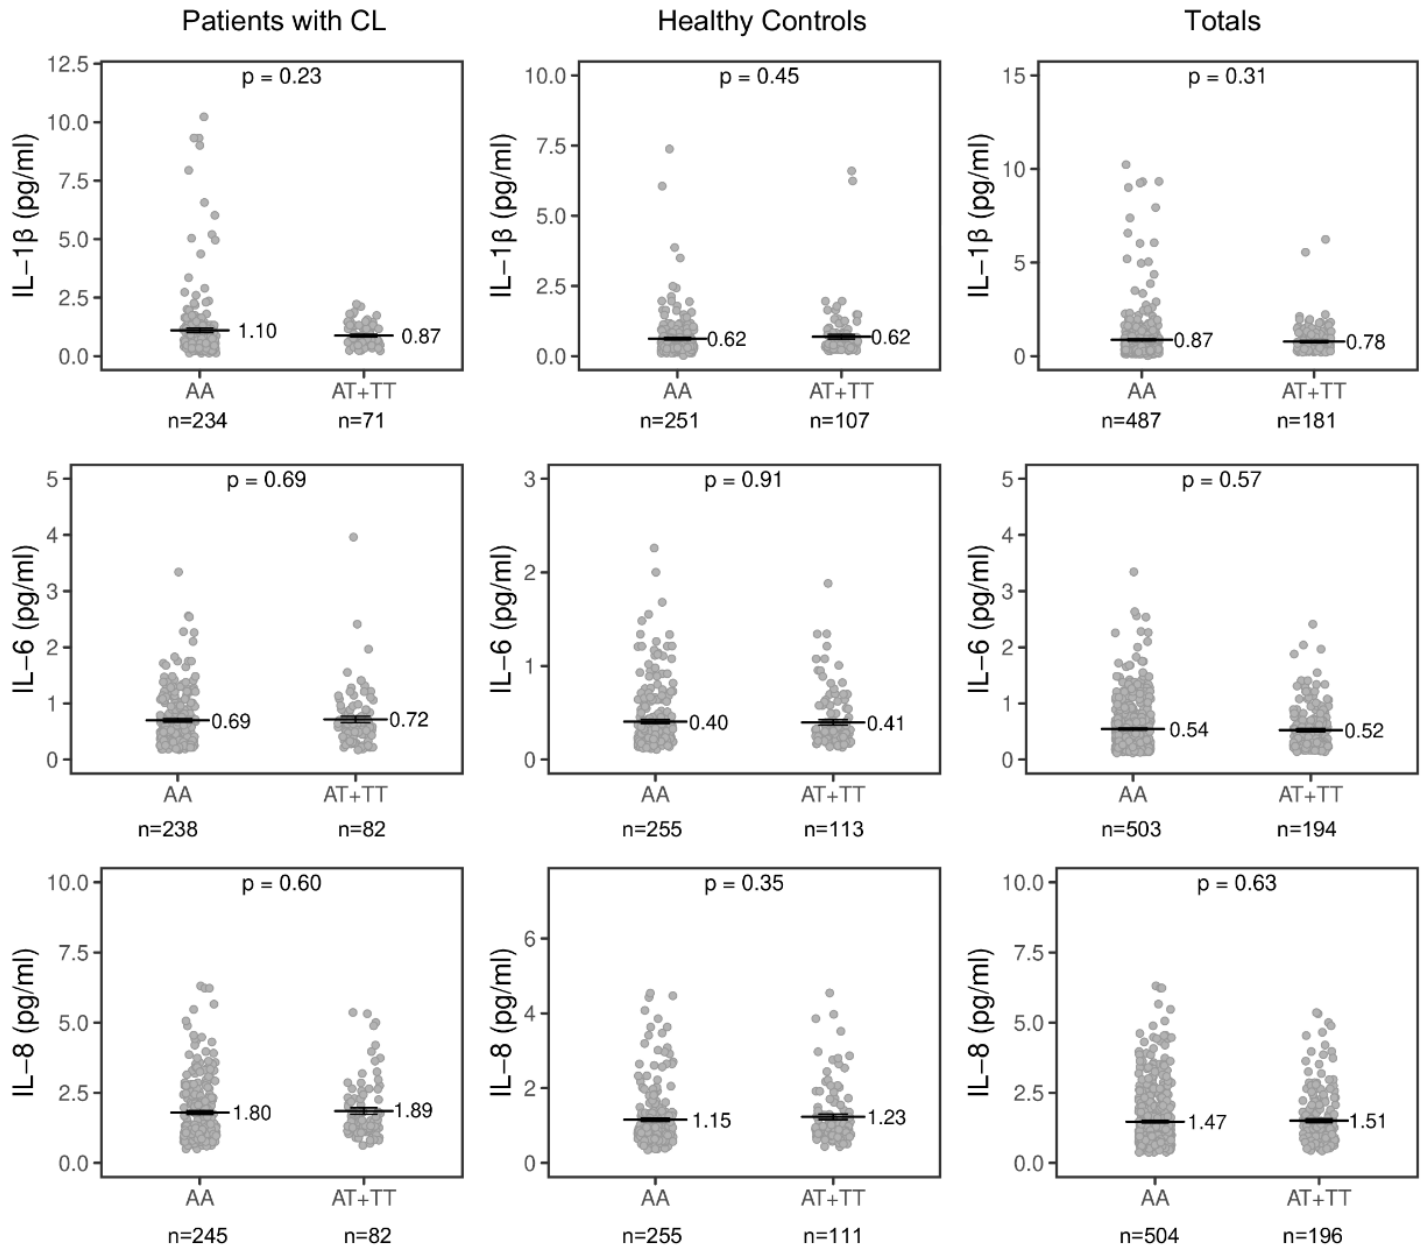

**S1A-B Figure** *TREM1* rs2234237 A/T (Thr25Ser) influence on circulating plasma levels of IL-1 $\beta$ , IL-6, IL-8, IL-10, MCP-1 and TNF- $\alpha$  in patients with CL, healthy controls and total subjects adjusted by sex and age. The black bars represent the mean of concentrations in picogram per milliter (pg/ml), whereas error bars represent standard error of mean. *p*-value <0.05 is considered significant.

## S1B Figure

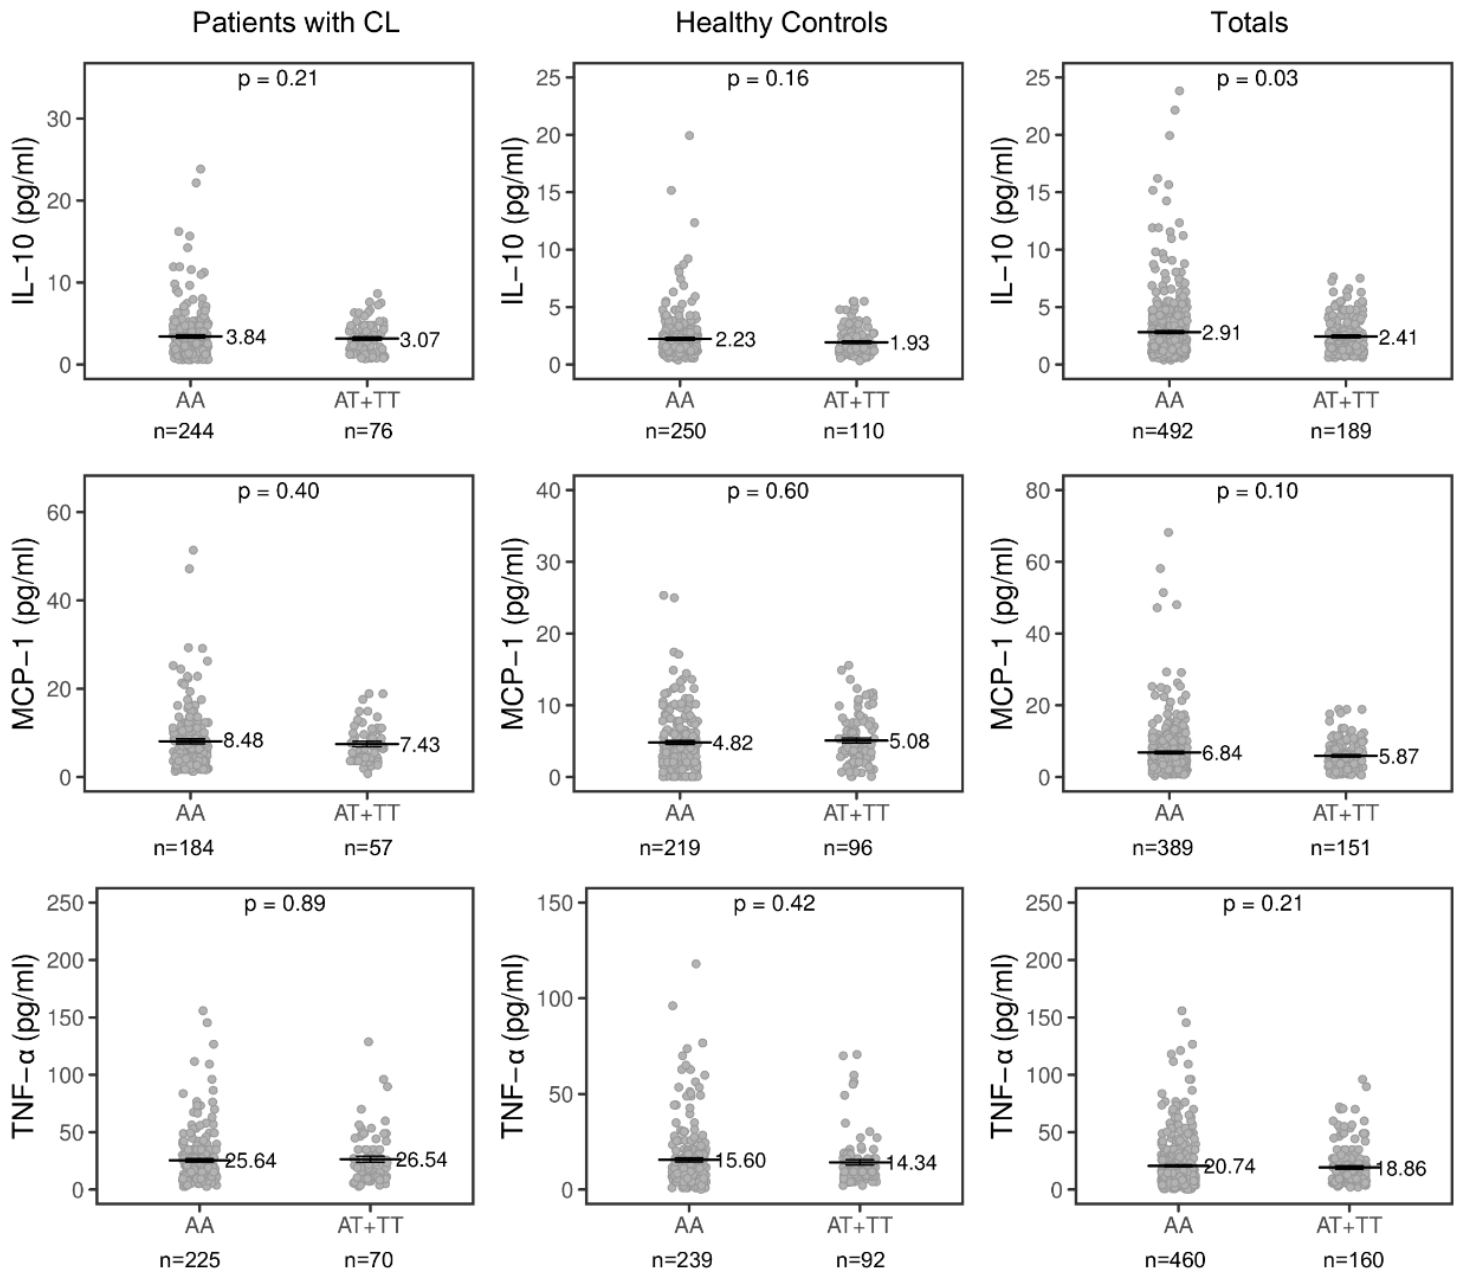

**S1A-B Figure** *TREMI* rs2234237 A/T (Thr25Ser) influence on circulating plasma levels of IL-1 $\beta$ , IL-6, IL-8, IL-10, MCP-1 and TNF- $\alpha$  in patients with CL, healthy controls and total subjects adjusted by sex and age. The black bars represent the mean of concentrations in picogram per milliter (pg/ml), whereas error bars represent standard error of mean.  $p$ -value  $<0.05$  is considered significant.
