# Supplementary material for: TREM1 rs2234237 (Thr25Ser) Polymorphism in Patients with Cutaneous Leishmaniasis Caused by Leishmania guyanensis: A Case-Control Study in the State of Amazonas, Brazil
Source: MDPI journal article supplement (doi:10.3390/pathogens10040498), 2021-04-20
Supplement: s1 [file s1]

**Supplementary Table S1. Circulating plasma cytokines levels in patients with CL and healthy controls adjusted by sex and age.**

| Cases            | IL-1β |        |         |         |                   |         | IL-6 |        |         |         |                   |         | IL-8 |       |         |         |                   |         | IL-10 |       |        |         |                    |         | MCP-1 |       |        |         |                   |         | TNF-α |       |        |         |                   |         |  |  |
|------------------|-------|--------|---------|---------|-------------------|---------|------|--------|---------|---------|-------------------|---------|------|-------|---------|---------|-------------------|---------|-------|-------|--------|---------|--------------------|---------|-------|-------|--------|---------|-------------------|---------|-------|-------|--------|---------|-------------------|---------|--|--|
| Codominant       | n     | me     | se      | p-value | Corrected p-value | q-value | n    | me     | se      | p-value | Corrected P-value | q-value | n    | me    | se      | p-value | Corrected P-value | q-value | n     | me    | se     | p-value | Corrected* P-value | q-value | n     | me    | se     | p-value | Corrected P-value | q-value | n     | me    | se     | p-value | Corrected P-value | q-value |  |  |
| A/A              | 234   | 1.1096 | 0.09829 | 0.41    | 0.52              | 0.88    | 238  | 0.6999 | 0.03162 | 0.92    | 0.92              | 0.93    | 245  | 1.805 | 0.07382 | 0.70    | 0.73              | 0.91    | 244   | 3.846 | 0.3493 | 0.29    | 0.42               | 0.88    | 184   | 8.486 | 0.6880 | 0.64    | 0.80              | 0.91    | 225   | 25.64 | 1.568  | 0.45    | 0.89              | 0.88    |  |  |
| A/T              | 66    | 0.8494 | 0.05760 |         |                   |         | 78   | 0.7265 | 0.06313 |         |                   |         | 77   | 1.913 | 0.12592 |         |                   |         | 71    | 2.940 | 0.2154 |         |                    |         | 53    | 7.280 | 0.6264 |         |                   |         | 65    | 25.62 | 2.927  |         |                   |         |  |  |
| T/T              | 5     | 1.2660 | 0.31799 |         |                   |         | 4    | 0.7425 | 0.08788 |         |                   |         | 5    | 1.522 | 0.32018 |         |                   |         | 5     | 5.012 | 1.1503 |         |                    |         | 4     | 9.462 | 2.7344 |         |                   |         | 5     | 38.50 | 6.806  |         |                   |         |  |  |
| Dominant         |       |        |         |         |                   |         |      |        |         |         |                   |         |      |       |         |         |                   |         |       |       |        |         |                    |         |       |       |        |         |                   |         |       |       |        |         |                   |         |  |  |
| A/A              | 234   | 1.1096 | 0.09829 | 0.23    | 0.52              | 0.88    | 238  | 0.6999 | 0.03162 | 0.69    | 0.92              | 0.91    | 245  | 1.805 | 0.07382 | 0.60    | 0.73              | 0.90    | 244   | 3.846 | 0.3493 | 0.21    | 0.42               | 0.88    | 184   | 8.486 | 0.6880 | 0.40    | 0.80              | 0.88    | 225   | 25.64 | 1.568  | 0.89    | 0.89              | 0.93    |  |  |
| A/T-T/T          | 71    | 0.8787 | 0.05859 |         |                   |         | 82   | 0.7273 | 0.06015 |         |                   |         | 82   | 1.890 | 0.11995 |         |                   |         | 76    | 3.076 | 0.2205 |         |                    |         | 57    | 7.433 | 0.6103 |         |                   |         | 70    | 26.54 | 2.780  |         |                   |         |  |  |
| Recessive        |       |        |         |         |                   |         |      |        |         |         |                   |         |      |       |         |         |                   |         |       |       |        |         |                    |         |       |       |        |         |                   |         |       |       |        |         |                   |         |  |  |
| A/A-A/T          | 300   | 1.0524 | 0.07791 | 0.80    | 0.80              | 0.92    | 316  | 0.7065 | 0.02841 | 0.92    | 0.92              | 0.93    | 312  | 1.831 | 0.06369 | 0.59    | 0.73              | 0.90    | 315   | 3.642 | 0.2756 | 0.53    | 0.53               | 0.89    | 237   | 8.216 | 0.5526 | 0.82    | 0.82              | 0.93    | 290   | 25.64 | 1.380  | 0.21    | 0.89              | 0.88    |  |  |
| T/T              | 5     | 1.2660 | 0.31799 |         |                   |         | 4    | 0.7425 | 0.08788 |         |                   |         | 5    | 1.522 | 0.32018 |         |                   |         | 5     | 5.012 | 1.1503 |         |                    |         | 4     | 9.462 | 2.7344 |         |                   |         | 5     | 38.50 | 6.806  |         |                   |         |  |  |
| Overdominant     |       |        |         |         |                   |         |      |        |         |         |                   |         |      |       |         |         |                   |         |       |       |        |         |                    |         |       |       |        |         |                   |         |       |       |        |         |                   |         |  |  |
| A/A-T/T          | 239   | 1.1129 | 0.09642 | 0.18    | 0.52              | 0.88    | 242  | 0.7006 | 0.03112 | 0.70    | 0.92              | 0.92    | 250  | 1.800 | 0.07262 | 0.49    | 0.73              | 0.88    | 249   | 3.869 | 0.3431 | 0.14    | 0.42               | 0.88    | 188   | 8.507 | 0.6753 | 0.35    | 0.80              | 0.88    | 230   | 25.92 | 1.544  | 0.80    | 0.89              | 0.92    |  |  |
| A/T              | 66    | 0.8494 | 0.05760 |         |                   |         | 78   | 0.7265 | 0.06313 |         |                   |         | 77   | 1.913 | 0.12592 |         |                   |         | 71    | 2.940 | 0.2154 |         |                    |         | 53    | 7.280 | 0.6264 |         |                   |         | 65    | 25.62 | 2.927  |         |                   |         |  |  |
| Log-Additive     |       |        |         |         |                   |         |      |        |         |         |                   |         |      |       |         |         |                   |         |       |       |        |         |                    |         |       |       |        |         |                   |         |       |       |        |         |                   |         |  |  |
| 0,1,2            |       |        |         | 0.31    | 0.52              | 0.88    |      |        |         | 0.70    | 0.92              | 0.91    |      |       |         | 0.73    | 0.73              | 0.92    |       |       |        | 0.33    | 0.42               | 0.88    |       |       |        | 0.48    | 0.80              | 0.88    |       | 0.64  | 0.89   | 0.91    |                   |         |  |  |
| Healthy Controls |       |        |         |         |                   |         |      |        |         |         |                   |         |      |       |         |         |                   |         |       |       |        |         |                    |         |       |       |        |         |                   |         |       |       |        |         |                   |         |  |  |
| Codominant       |       |        |         |         |                   |         |      |        |         |         |                   |         |      |       |         |         |                   |         |       |       |        |         |                    |         |       |       |        |         |                   |         |       |       |        |         |                   |         |  |  |
| A/A              | 251   | 0.6202 | 0.04669 | 0.66    | 0.77              | 0.91    | 255  | 0.4052 | 0.02091 | 0.80    | 0.91              | 0.92    | 255  | 1.156 | 0.04703 | 0.64    | 0.80              | 0.91    | 250   | 2.235 | 0.1339 | 0.36    | 0.45               | 0.88    | 219   | 4.821 | 0.2719 | 0.70    | 0.77              | 0.91    | 234   | 15.60 | 1.0959 | 0.72    | 0.82              | 0.92    |  |  |
| A/T              | 97    | 0.7069 | 0.09455 |         |                   |         | 102  | 0.4195 | 0.03499 |         |                   |         | 101  | 1.238 | 0.08039 |         |                   |         | 99    | 1.926 | 0.1179 |         |                    |         | 88    | 5.153 | 0.3827 |         |                   |         | 83    | 14.37 | 1.5700 |         |                   |         |  |  |
| T/T              | 10    | 0.5730 | 0.08416 |         |                   |         | 11   | 0.3509 | 0.04241 |         |                   |         | 10   | 1.199 | 0.15362 |         |                   |         | 11    | 2.061 | 0.3950 |         |                    |         | 8     | 4.325 | 0.9907 |         |                   |         | 9     | 14.09 | 2.4186 |         |                   |         |  |  |
| Dominant         |       |        |         |         |                   |         |      |        |         |         |                   |         |      |       |         |         |                   |         |       |       |        |         |                    |         |       |       |        |         |                   |         |       |       |        |         |                   |         |  |  |
| A/A              | 251   | 0.6202 | 0.04669 | 0.45    | 0.77              | 0.88    | 255  | 0.4052 | 0.02091 | 0.91    | 0.91              | 0.93    | 255  | 1.156 | 0.04703 | 0.35    | 0.66              | 0.88    | 250   | 2.235 | 0.1339 | 0.16    | 0.34               | 0.88    | 219   | 4.821 | 0.2719 | 0.60    | 0.77              | 0.90    | 234   | 15.60 | 1.0959 | 0.42    | 0.75              | 0.88    |  |  |
| A/T-TT           | 107   | 0.6244 | 0.08608 |         |                   |         | 113  | 0.4128 | 0.03187 |         |                   |         | 111  | 1.235 | 0.07430 |         |                   |         | 110   | 1.939 | 0.1126 |         |                    |         | 96    | 5.084 | 0.3599 |         |                   |         | 92    | 14.34 | 1.4332 |         |                   |         |  |  |
| Recessive        |       |        |         |         |                   |         |      |        |         |         |                   |         |      |       |         |         |                   |         |       |       |        |         |                    |         |       |       |        |         |                   |         |       |       |        |         |                   |         |  |  |
| A/A-A/T          | 348   | 0.6443 | 0.04274 | 0.77    | 0.77              | 0.92    | 357  | 0.4093 | 0.01795 | 0.54    | 0.91              | 0.89    | 365  | 1.179 | 0.04067 | 0.92    | 0.92              | 0.93    | 349   | 2.147 | 0.1017 | 0.87    | 0.87               | 0.93    | 307   | 4.916 | 0.2227 | 0.59    | 0.77              | 0.90    | 317   | 15.28 | 0.9067 | 0.82    | 0.82              | 0.93    |  |  |
| T/T              | 10    | 0.5730 | 0.08416 |         |                   |         | 11   | 0.3509 | 0.04241 |         |                   |         | 10   | 1.199 | 0.15362 |         |                   |         | 11    | 2.061 | 0.3950 |         |                    |         | 8     | 4.325 | 0.9907 |         |                   |         | 9     | 14.09 | 2.4186 |         |                   |         |  |  |
| Overdominant     |       |        |         |         |                   |         |      |        |         |         |                   |         |      |       |         |         |                   |         |       |       |        |         |                    |         |       |       |        |         |                   |         |       |       |        |         |                   |         |  |  |
| A/A-T/T          | 261   | 0.6184 | 0.04501 | 0.37    | 0.77              | 0.88    | 266  | 0.4030 | 0.02012 | 0.73    | 0.91              | 0.92    | 265  | 1.158 | 0.04559 | 0.35    | 0.66              | 0.88    | 261   | 2.227 | 0.1292 | 0.16    | 0.34               | 0.88    | 227   | 4.803 | 0.2644 | 0.47    | 0.77              | 0.88    | 243   | 15.54 | 1.0588 | 0.45    | 0.75              | 0.88    |  |  |
| A/T              | 97    | 0.7069 | 0.09455 |         |                   |         | 102  | 0.4195 | 0.03499 |         |                   |         | 101  | 1.238 | 0.08039 |         |                   |         | 99    | 1.926 | 0.1179 |         |                    |         | 88    | 5.153 | 0.3827 |         |                   |         | 83    | 14.37 | 1.5700 |         |                   |         |  |  |
| Log-Additive     |       |        |         |         |                   |         |      |        |         |         |                   |         |      |       |         |         |                   |         |       |       |        |         |                    |         |       |       |        |         |                   |         |       |       |        |         |                   |         |  |  |
| 0,1,2            |       |        |         | 0.57    | 0.77              | 0.90    |      |        |         | 0.91    | 0.91              | 0.93    |      |       |         | 0.40    | 0.66              | 0.88    |       |       |        | 0.20    | 0.34               | 0.88    |       |       |        | 0.77    | 0.77              | 0.92    |       | 0.44  | 0.75   | 0.88    |                   |         |  |  |
| Totals           |       |        |         |         |                   |         |      |        |         |         |                   |         |      |       |         |         |                   |         |       |       |        |         |                    |         |       |       |        |         |                   |         |       |       |        |         |                   |         |  |  |
| Codominant       |       |        |         |         |                   |         |      |        |         |         |                   |         |      |       |         |         |                   |         |       |       |        |         |                    |         |       |       |        |         |                   |         |       |       |        |         |                   |         |  |  |
| A/A              | 487   | 0.8720 | 0.05679 | 0.59    | 0.74              | 0.90    | 503  | 0.5449 | 0.02000 | 0.69    | 0.75              | 0.91    | 504  | 1.474 | 0.04593 | 0.62    | 0.79              | 0.91    | 492   | 2.910 | 0.1412 | 0.05    | 0.10               | 0.88    | 389   | 6.849 | 0.3806 | 0.26    | 0.32              | 0.88    | 460   | 20.74 | 0.9995 | 0.24    | 0.41              | 0.88    |  |  |
| A/T              | 167   | 0.7031 | 0.06636 |         |                   |         | 179  | 0.5336 | 0.03018 |         |                   |         | 181  | 1.536 | 0.07637 |         |                   |         | 174   | 2.353 | 0.1219 |         |                    |         | 139   | 5.856 | 0.3415 |         |                   |         | 147   | 18.40 | 1.3959 |         |                   |         |  |  |
| T/T              | 14    | 0.8443 | 0.14676 |         |                   |         | 15   | 0.4553 | 0.05938 |         |                   |         | 15   | 1.307 | 0.14674 |         |                   |         | 15    | 3.141 | 0.5672 |         |                    |         | 12    | 6.097 | 1.2525 |         |                   |         | 13    | 24.04 | 4.3760 |         |                   |         |  |  |
| Dominant         |       |        |         |         |                   |         |      |        |         |         |                   |         |      |       |         |         |                   |         |       |       |        |         |                    |         |       |       |        |         |                   |         |       |       |        |         |                   |         |  |  |
| A/A              | 487   | 0.8720 | 0.05679 | 0.31    | 0.61              | 0.88    | 503  | 0.5449 | 0.02000 | 0.57    | 0.75              | 0.90    | 504  | 1.474 | 0.04593 | 0.63    | 0.79              | 0.91    | 492   | 2.910 | 0.1412 | 0.03    | 0.09               | 0.88    | 389   | 6.849 | 0.3806 | 0.10    | 0.20              | 0.88    | 460   | 20.74 | 0.9995 | 0.21    | 0.41              | 0.88    |  |  |
| A/T-TT           | 181   | 0.7878 | 0.06220 |         |                   |         | 194  | 0.5276 | 0.02823 |         |                   |         | 196  | 1.518 | 0.07148 |         |                   |         | 189   | 2.415 | 0.1214 |         |                    |         | 151   | 5.875 | 0.3286 |         |                   |         | 160   | 18.86 | 1.3327 |         |                   |         |  |  |
| Recessive        |       |        |         |         |                   |         |      |        |         |         |                   |         |      |       |         |         |                   |         |       |       |        |         |                    |         |       |       |        |         |                   |         |       |       |        |         |                   |         |  |  |
| A/A-A/T          | 654   | 0.8493 | 0.04556 | 0.98    | 0.98              | 0.94    | 682  | 0.5420 | 0.01673 | 0.44    | 0.75              | 0.88    | 685  | 1.491 | 0.03934 | 0.47    | 0.79              | 0.88    | 666   | 2.764 | 0.1094 | 0.59    | 0.70               | 0.90    | 528   | 6.587 | 0.2950 | 0.74    | 0.74              | 0.92    | 607   | 20.18 | 0.8300 | 0.43    | 0.43              | 0.88    |  |  |
| T/T              | 14    | 0.8443 | 0.14676 |         |                   |         | 15   | 0.4553 | 0.05938 |         |                   |         | 15   | 1.307 | 0.14674 |         |                   |         | 15    | 3.141 | 0.5672 |         |                    |         | 12    | 6.097 | 1.2525 |         |                   |         | 13    | 24.04 | 4.3770 |         |                   |         |  |  |
| Overdominant     |       |        |         |         |                   |         |      |        |         |         |                   |         |      |       |         |         |                   |         |       |       |        |         |                    |         |       |       |        |         |                   |         |       |       |        |         |                   |         |  |  |
| A/A-T/T          | 501   | 0.8712 | 0.05535 | 0.30    | 0.61              | 0.88    | 518  | 0.5423 | 0.01950 | 0.75    | 0.75              | 0.92    | 519  | 1.469 | 0.04480 | 0.47    | 0.79              | 0.88    | 507   | 2.917 | 0.1380 | 0.01    | 0.06               | 0.88    | 401   | 6.826 | 0.3710 | 0.11    | 0.20              | 0.88    | 473   | 20.83 | 0.9792 | 0.12    | 0.41              | 0.88    |  |  |
| A/T              | 167   | 0.7831 | 0.06636 |         |                   |         | 179  | 0.5336 | 0.03018 |         |                   |         | 181  | 1.536 | 0.07637 |         |                   |         | 174   | 2.353 | 0.1219 |         |                    |         | 139   | 5.856 | 0.3415 |         |                   |         | 147   | 18.40 | 1.3959 |         |                   |         |  |  |
| Log-Additive     |       |        |         |         |                   |         |      |        |         |         |                   |         |      |       |         |         |                   |         |       |       |        |         |                    |         |       |       |        |         |                   |         |       |       |        |         |                   |         |  |  |
| 0,1,2            |       |        |         | 0.37    | 0.61              | 0.88    |      |        |         | 0.47    | 0.75              | 0.88    |      |       |         | 0.83    | 0.83              | 0.93    |       |       |        | 0.07    | 0.10               | 0.88    |       |       |        | 0.12    | 0.20              | 0.88    |       | 0.38  | 0.43   | 0.88    |                   |         |  |  |
| Homozygous       |       |        |         |         |                   |         |      |        |         |         |                   |         |      |       |         |         |                   |         |       |       |        |         |                    |         |       |       |        |         |                   |         |       |       |        |         |                   |         |  |  |
| A/A              |       |        |         |         |                   |         |      |        |         |         |                   |         |      |       |         |         |                   |         | 492   | 2.910 | 0.1412 | 0.76    | 0.76               | 0.92    |       |       |        |         |                   |         |       |       |        |         |                   |         |  |  |
| T/T              |       |        |         |         |                   |         |      |        |         |         |                   |         |      |       |         |         |                   |         | 15    | 3.141 | 0.5672 |         |                    |         |       |       |        |         |                   |         |       |       |        |         |                   |         |  |  |

me: mean (pg/mL); se: standard error;  $p < 0.05$  is considered significant., Corrected  $p$ -value: Benjamini and Hochberg's for strong control of the false discovery rate assuming five tests (codominant, dominant, recessive, overdominant, additive,); Corrected  $p$ -value\*: Benjamini and Hochberg's for strong control of the false discovery rate assuming six tests (codominant, dominant, recessive, overdominant, additive, and homozygous) and FDR  $q$ -value.
